# Supplementary material for: Human Adenovirus and Influenza A Virus Exacerbate SARS-CoV-2 Infection in Animal Models
Source: MDPI journal article supplement (doi:10.3390/microorganisms11010180), 2023-01-11
Supplement: s1 [file s1]

Table S3: Determination of the HAdV-5 replicative activity in the lungs of monoinfected and coinfecting with SARS-CoV-2 hamsters by the formazan-based MTT assay.

| Dilutions of lung homogenates          | SARS-CoV-2  | SARS-CoV-2/HAdV-5 | HAdV-5/3 days/SARS-CoV-2 | Mock-infected |
|----------------------------------------|-------------|-------------------|--------------------------|---------------|
| Optical Density (OD <sub>570</sub> )   |             |                   |                          |               |
| 10 <sup>0</sup>                        | 0.118±0.023 | 0.120±0.020       | 0.123±0.025              | 1.355±0.229   |
| 10 <sup>-1</sup>                       | 0.123±0.034 | 0.132±0.031       | 0.135±0.039              | 1.349±0.237   |
| 10 <sup>-2</sup>                       | 0.137±0.036 | 0.127±0.026       | 0.147±0.040              | 1.340±0.234   |
| 10 <sup>-3</sup>                       | 0.145±0.049 | 0.136±0.032       | 0.479±0.079              | 1.350±0.243   |
| 10 <sup>-4</sup>                       | 0.133±0.037 | 0.585±0.094       | 1.121±0.221              | 1.290±0.215   |
| 10 <sup>-5</sup>                       | 0.143±0.040 | 0.913±0.174       | 1.255±0.235              | 1.322±0.227   |
| 10 <sup>-6</sup>                       | 0.515±0.133 | 1.325±0.243       | 1.270±0.263              | 1.269±0.243   |
| 10 <sup>-7</sup>                       | 1.115±0.223 | 1.348±0.234       | 1.229±0.242              | 1.310±0.259   |
| Virus Titer (lg TCID <sub>50</sub> /g) |             |                   |                          |               |
|                                        | 6.77±0.45   | 4.86±0.37         | 3.44±0.30                | <1.00         |

Data are the mean ±SEM of 2 independent MTT tests (3 replicates per point). lgTCID<sub>50</sub> values were determined according to the method of Kärber as modified [1].

1. Ashmarin I.P., Vorob'ev A.A. *Statistical Methods in the Microbiological Research*. State Press of Medical Literature; Leningrad, USSR: 1962. pp. 85–104.
