# Supplementary material for: Human Adenovirus and Influenza A Virus Exacerbate SARS-CoV-2 Infection in Animal Models
Source: MDPI journal article supplement (doi:10.3390/microorganisms11010180), 2023-01-11
Supplement: s1 [file s1]

Table S1: Primers used in this study.

| Target         | Forward                                                                                                                                                            | Reverse               |
|----------------|--------------------------------------------------------------------------------------------------------------------------------------------------------------------|-----------------------|
| SARS-CoV-2 lab | TAGACATCATGCTAATGAGTACAGAT                                                                                                                                         | TGAAGTCTTGTAAGTGTTCAG |
|                | Probe ROX-GCTTATAACATGATGATCTCAGCTGGC-BHQ1                                                                                                                         |                       |
| HAdV-5 hexon   | CCCITCGATGMTGCCCC                                                                                                                                                  | CIACGGGIACIAARCGCA    |
|                | Probe ROX-CCTGGCCCGAGATGTGCAT-BHQ1                                                                                                                                 |                       |
| IAV M          | The IAV primers and probe sequences are published as part of the<br>AmpliSens® Influenza virus A/B-FL detection kit (Moscow, Russia,<br>Reg.# RU #FSR 2009/05010). |                       |
