# Supplementary material for: Human Adenovirus and Influenza A Virus Exacerbate SARS-CoV-2 Infection in Animal Models
Source: MDPI journal article supplement (doi:10.3390/microorganisms11010180), 2023-01-11
Supplement: s1 [file s1]

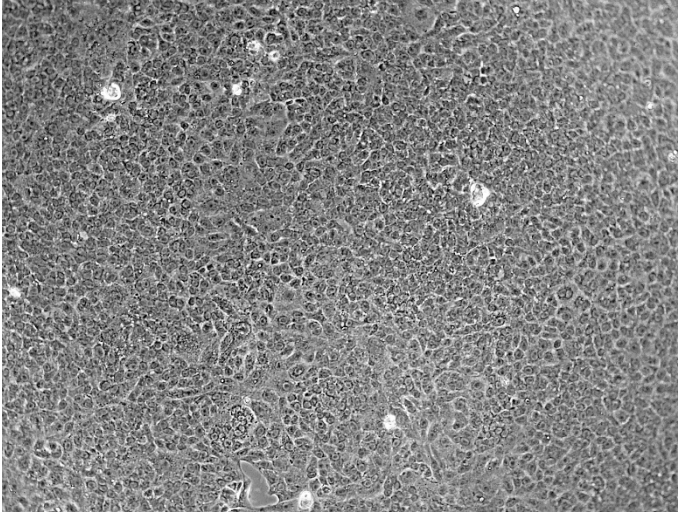

a)

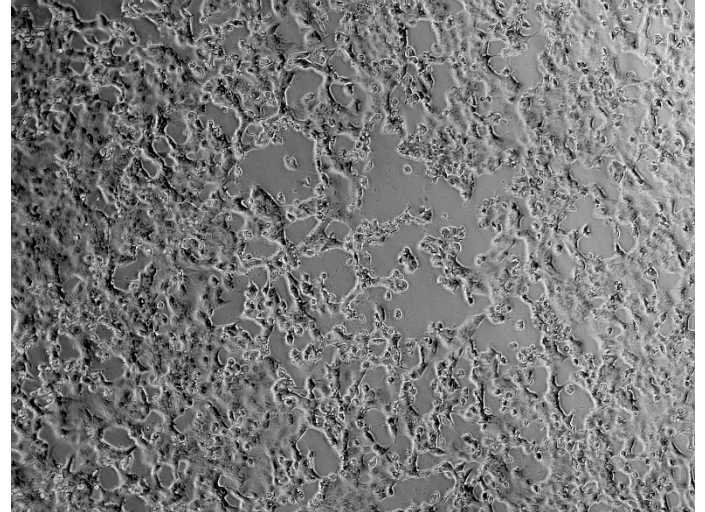

b)

Figure S1: SARS-CoV-2 CPE in the Vero E6 cell monolayer.

a) Mock-infected cells; b) SARS-CoV-2 infected cells (MOI 0.1 TCID<sub>50</sub>, 48 h post infection).  
Magnification  $\times 100$ .
