# Supplementary material for: Human Adenovirus and Influenza A Virus Exacerbate SARS-CoV-2 Infection in Animal Models
Source: MDPI journal article supplement (doi:10.3390/microorganisms11010180), 2023-01-11
Supplement: s1 [file s1]

Table S2: Determination of the SARS-CoV-2 replicative activity in the lungs of monoinfected and coinfecting with HAdV-5 hamsters by the formazan-based MTT assay.

| Dilutions of lung homogenates          | SARS-CoV-2  | SARS-CoV-2/HAdV-5 | HAdV-5/3 days/SARS-CoV-2 | Mock-infected |
|----------------------------------------|-------------|-------------------|--------------------------|---------------|
| Optical Density (OD <sub>570</sub> )   |             |                   |                          |               |
| 10 <sup>0</sup>                        | 0.123±0.024 | 0.137±0.029       | 0.144±0.035              | 1.230±0.215   |
| 10 <sup>-1</sup>                       | 0.143±0.035 | 0.153±0.044       | 0.147±0.041              | 1.244±0.207   |
| 10 <sup>-2</sup>                       | 0.135±0.041 | 0.129±0.037       | 0.157±0.045              | 1.233±0.217   |
| 10 <sup>-3</sup>                       | 0.128±0.037 | 0.125±0.041       | 0.121±0.029              | 1.250±0.220   |
| 10 <sup>-4</sup>                       | 0.155±0.046 | 0.167±0.044       | 0.141±0.035              | 1.227±0.195   |
| 10 <sup>-5</sup>                       | 0.513±0.094 | 0.453±0.087       | 0.537±0.115              | 1.242±0.211   |
| 10 <sup>-6</sup>                       | 0.836±0.144 | 0.723±0.127       | 0.870±0.163              | 1.239±0.223   |
| 10 <sup>-7</sup>                       | 1.248±0.234 | 1.237±0.222       | 1.229±0.192              | 1.243±0.227   |
| Virus Titer (lg TCID <sub>50</sub> /g) |             |                   |                          |               |
|                                        | 6.43±0.36   | 6.60±0.44         | 6.27±0.32                | <1.00         |

Data are the mean ±SEM of 2 independent MTT tests (3 replicates per point). lgTCID<sub>50</sub> values were determined according to the method of Kärber as modified [1].

1. Ashmarin I.P., Vorob'ev A.A. *Statistical Methods in the Microbiological Research*. State Press of Medical Literature; Leningrad, USSR: 1962. pp. 85–104.
